# Supplementary material for: The whole profiling and competing endogenous RNA network analyses of noncoding RNAs in adipose-derived stem cells from diabetic, old, and young patients
Source: PubMed Central journal article supplement (PMC8164820; doi:10.1186/s13287-021-02388-5), 2021-05-29

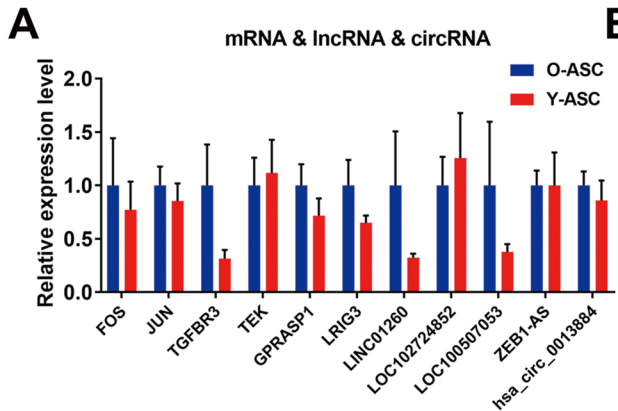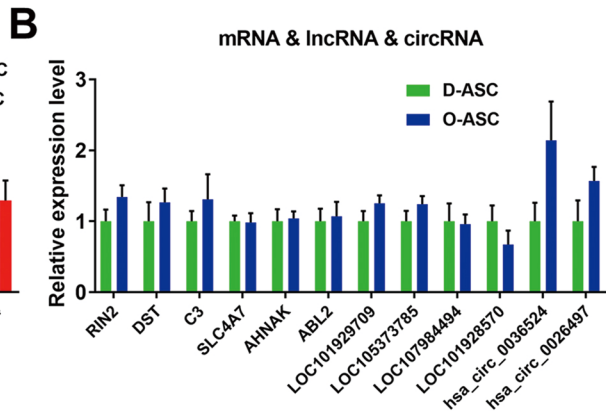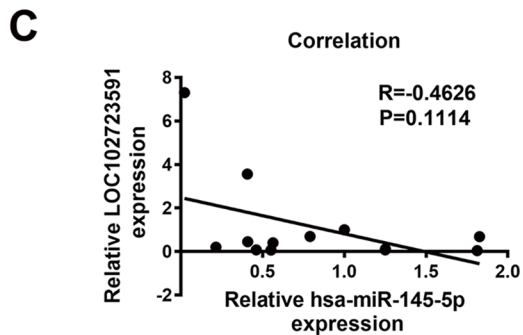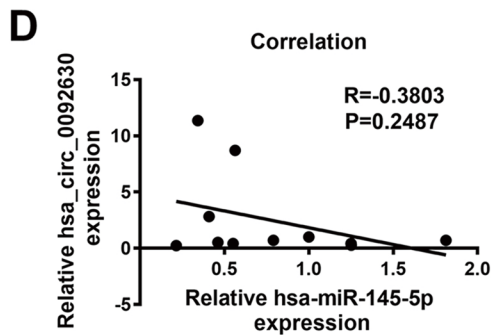

Supplement: 13287_2021_2388_MOESM2_ESM.pdf [file 13287_2021_2388_MOESM2_ESM.pdf]
