# Supplementary material for: The whole profiling and competing endogenous RNA network analyses of noncoding RNAs in adipose-derived stem cells from diabetic, old, and young patients
Source: PubMed Central journal article supplement (PMC8164820; doi:10.1186/s13287-021-02388-5), 2021-05-29

**A**

mimic-NC-cy3 50nM

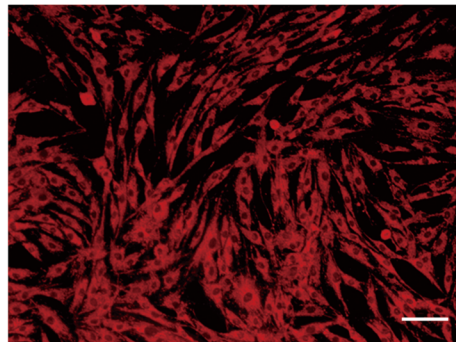**B**

inhibitor-NC-5-FAM 200nM

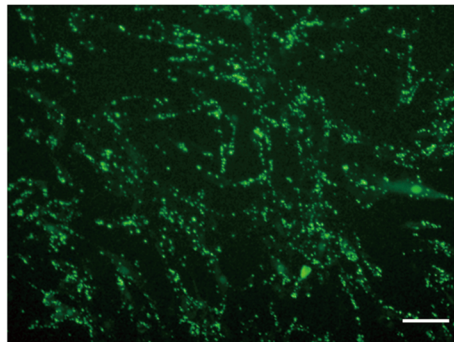**C**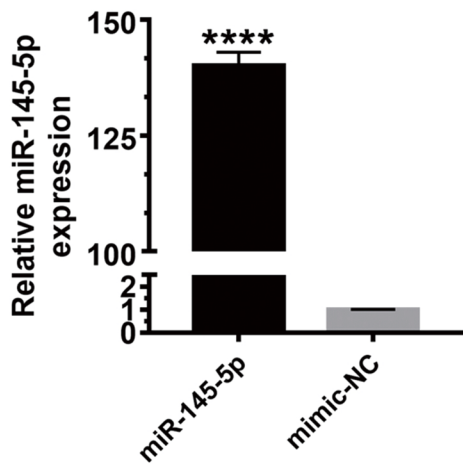**D**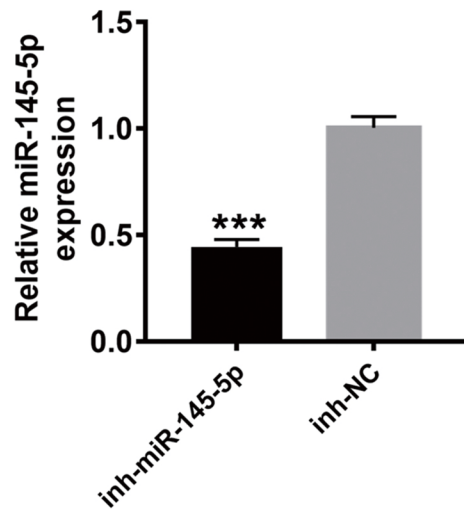

Supplement: 13287_2021_2388_MOESM19_ESM.pdf [file 13287_2021_2388_MOESM19_ESM.pdf]
