# Supplementary material for: The whole profiling and competing endogenous RNA network analyses of noncoding RNAs in adipose-derived stem cells from diabetic, old, and young patients
Source: Stem Cell Res Ther. 2021 May 29;12:313. doi: 10.1186/s13287-021-02388-5 (PMC8164820; doi:10.1186/s13287-021-02388-5)
Supplement: Supplementary file 5 — Additional file 5: Data S3. Differentially expressed lncRNAs between O-ASCs and Y-ASCs. [file 13287_2021_2388_MOESM5_ESM.xlsx]

## Sheet: 158116377092620933
Gene ID	Gene Symbol	Type	Known/Novel Gene	p1_O_ASC1 Expression	p1_O_ASC2 Expression	p1_O_ASC3 Expression	p1_Y_ASC1 Expression	p1_Y_ASC2 Expression	p1_Y_ASC3 Expression	log2 (p1_Y_ASC/p1_O_ASC)	Pvalue(p1_O_ASC-vs-p1_Y_ASC)	Qvalue (p1_O_ASC-vs-p1_Y_ASC)
107986148	LOC107986148	lncRNA	known	0.3	1.23	2.32	0.83	26.35	17.4	3.62457	0	0
100506621	LINC01279	lncRNA	known	7.48	3.81	19.62	4.47	75.93	4.81	1.51982	0	0
284454	LOC284454	lncRNA	known	0.67	2.37	3.03	2.78	21.79	4.67	2.44954	0	0
84848	MIR503HG	lncRNA	known	2.47	7.69	5.31	2.16	34.81	3.46	1.30432	0	0
102724852	LOC102724852	lncRNA	known	48.67	2.67	2.56	0.5	19.03	1.03	-1.90716	0	0
283120	H19	lncRNA	known	37.26	1.96	1.55	0.28	9.81	0.64	-2.23532	0	0
105377441	LINC02511	lncRNA	known	199.75	15.55	39.74	26.82	20.58	9.55	-2.34722	0	0
729307	LINC02510	lncRNA	known	37.41	4.98	9.61	4.84	4.83	1.68	-2.2033	4.93054e-306	3.9593e-304
642477	642477	lncRNA	known	3.46	7.62	22.25	0.25	4.05	0.29	-2.60895	7.8346e-302	6.16421e-300
107984146	LOC107984146	lncRNA	known	4.83	4.59	112.15	62.89	56.72	81.21	1.10718	1.17239e-288	8.80197e-287
441389	LINC01239	lncRNA	known	17.58	2.63	3.82	1.47	0.59	3.81	-2.16434	5.68147e-240	3.54745e-238
654433	PAX8-AS1	lncRNA	known	5.36	7.33	18.76	1.29	6.51	6.64	-1.18565	3.21239e-199	1.70799e-197
100507053	LOC100507053	lncRNA	known	10.03	8.66	13.38	5.88	5.72	4.69	-1.03691	7.02579e-186	3.49685e-184
105376718	LOC105376718	lncRNA	known	0.24	0.26	4.18	0.29	0.75	0.47	-1.3647	2.31777e-181	1.12135e-179
101927155	LMO7-AS1	lncRNA	known	0.42	1.94	8.13	1.02	2.18	0.15	-1.73106	4.98918e-172	2.33055e-170
102723436	LOC102723436	lncRNA	known	5.15	0.39	2.85	0.47	0.38	0.45	-2.50765	7.32054e-165	3.32003e-163
574406	ADAMTSL4-AS1	lncRNA	known	0.8	0.61	3.49	0.61	9.4	8.64	1.98266	5.62615e-145	2.34037e-143
100131234	MIR181A1HG	lncRNA	known	0.22	0.94	1.83	1.08	2.5	1.21	1.40438	3.87451e-143	1.59049e-141
101927647	LOC101927647	lncRNA	known	63.95	33.7	132.71	30.03	15.55	26.37	-1.45691	1.25592e-135	4.97214e-134
643401	PURPL	lncRNA	known	0.73	0.33	3.9	0.42	0.11	0.42	-2.69973	2.7502e-104	8.77052e-103
112267883	LOC112267883	lncRNA	known	5.12	4.09	13.03	2.26	4.41	2.64	-1.28454	2.03558e-95	5.99458e-94
100507420	LINC01605	lncRNA	known	9.65	1.2	2.23	1.49	3.12	2.06	-1.47487	3.20381e-92	9.18318e-91
105378616	LINC01715	lncRNA	known	1.46	2.67	0.37	2.53	3.61	7	1.42795	4.01353e-88	1.10566e-86
100131604	LOC100131604	lncRNA	known	8.38	6.42	11.48	3.24	2	4.4	-1.36446	1.89181e-83	4.94905e-82
102723591	LOC102723591	lncRNA	known	6.59	0.25	4	0.3	0.2	0.11	-4.07713	5.0751e-80	1.28244e-78
100128537	MIR29B2CHG	lncRNA	known	1.37	1.23	1.29	0.76	0.53	0.45	-1.30394	8.07061e-74	1.92098e-72
105375586	LOC105375586	lncRNA	known	0.22	0.39	1.79	2.55	3	0.72	1.61849	1.3791e-69	3.16179e-68
101928583	LOC101928583	lncRNA	known	4.17	1.12	12.97	3.15	1.98	1.77	-1.45225	2.34203e-69	5.36154e-68
105376544	LOC105376544	lncRNA	known	2.87	5.27	7.6	2.71	1.71	2.8	-1.00483	3.25695e-64	7.01776e-63
102724210	LOC102724210	lncRNA	known	0.14	10.25	30.07	5.8	0.41	7.66	-1.24619	1.84036e-61	3.82267e-60
400728	FAM87B	lncRNA	known	0.47	0.31	4.46	3.35	0.81	5.17	1.78202	4.42627e-61	9.13306e-60
103752588	PACERR	lncRNA	known	0.2	1.05	1.11	1.77	2.93	2.85	1.78362	2.09229e-58	4.16281e-57
100048912	CDKN2B-AS1	lncRNA	known	1.27	1.36	6.96	0.69	2.02	1.19	-1.02967	2.25746e-56	4.35245e-55
101927528	LINC01204	lncRNA	known	0.36	0.33	4.39	0.16	0.77	0.68	-1.53231	1.2649e-54	2.38129e-53
100507002	LOC100507002	lncRNA	known	6.87	1.16	1.43	1.48	0.35	0.52	-2.33185	2.34091e-51	4.21108e-50
338758	ATP2B1-AS1	lncRNA	known	0.63	0.64	1.17	1.45	0.91	3.78	1.48871	1.39777e-50	2.4815e-49
647190	RPS16P5	lncRNA	known	0.1	0.32	1.82	0.54	4.2	0.69	1.4845	7.83487e-48	1.32669e-46
105372801	LOC105372801	lncRNA	known	0.26	0.68	3.61	0.23	1.01	0.33	-1.38616	1.67012e-44	2.67262e-43
107985201	LOC107985201	lncRNA	known	2.12	0.93	7.02	0.45	1.46	1.55	-1.37293	2.61496e-42	4.00365e-41
730101	LOC730101	lncRNA	known	2.59	0.74	0.88	0.52	0.68	0.57	-1.3464	5.49711e-42	8.37113e-41
403323	LOC403323	lncRNA	known	4.26	10.71	4.86	3.85	1.72	3.86	-1.87846	1.28148e-39	1.87716e-38
440918	FLJ46875	lncRNA	known	0.42	1	1.05	1.56	4.18	2.6	1.13651	2.09449e-37	2.91461e-36
105373869	LINC01614	lncRNA	known	0.14	1.16	0.52	0.59	4.87	0.2	1.58768	2.42778e-37	3.37388e-36
100505687	LINC00888	lncRNA	known	0.14	1.19	1	2.65	1.79	2.35	1.70759	2.51009e-37	3.48671e-36
101929174	LOC101929174	lncRNA	known	2.25	1.4	1.73	0.47	0.63	0.13	-1.80964	2.18111e-33	2.76697e-32
105376369	LOC105376369	lncRNA	known	0.25	0.98	0.68	1.03	1.42	3.32	1.62879	2.95444e-32	3.66301e-31
101926925	LINC01358	lncRNA	known	4.63	0.64	1.27	0.19	0.45	0.56	-2.42483	6.77553e-29	7.79562e-28
105370877	LOC105370877	lncRNA	known	0.11	0.1	0.81	0.13	1.2	0.51	1.06382	5.71625e-28	6.40883e-27
220930	ZEB1-AS1	lncRNA	known	2.42	2.94	4.3	1.47	1.56	1.91	-1.03463	1.30992e-27	1.45814e-26
105374506	LOC105374506	lncRNA	known	0.25	1.43	0.6	2.43	1.65	1.26	1.42041	4.18426e-27	4.60018e-26
84856	LINC00839	lncRNA	known	0.33	3.02	0.78	0.81	0.78	0.32	-1.35679	5.65061e-27	6.18174e-26
105372426	LOC105372426	lncRNA	known	1.74	0.22	0.5	0.19	0.11	0.24	-2.34679	1.10419e-25	1.16661e-24
79015	LINC01260	lncRNA	known	2.14	0.33	0.3	0.2	0.58	0.2	-2.35822	1.9576e-25	2.05502e-24
105378085	LOC105378085	lncRNA	known	0.15	0.87	6	0.66	0.6	0.51	-1.3261	8.42095e-25	8.66198e-24
107986013	LOC107986013	lncRNA	known	0.18	1.18	1.37	2.24	2.67	0.61	1.11041	5.53145e-24	5.54159e-23
105379250	LOC105379250	lncRNA	known	0.23	0.38	1.94	0.88	2.56	1.07	1.02286	8.74813e-24	8.69427e-23
285084	LINC01305	lncRNA	known	0.67	1.69	0.26	0.49	0.24	0.11	-1.55396	1.01857e-23	1.00844e-22
401472	GASAL1	lncRNA	known	0.21	0.83	0.8	1.31	2.16	1.55	1.05545	2.98758e-23	2.91525e-22
386627	SAP30L-AS1	lncRNA	known	0.17	0.2	1.61	0.15	0.28	0.25	-1.26143	4.11503e-23	3.99414e-22
105379219	FAM85B	lncRNA	known	0.26	1.54	3.6	0.25	1.01	0.38	-1.35067	9.78756e-23	9.38599e-22
285696	BASP1-AS1	lncRNA	known	1.65	0.37	0.69	0.7	0.24	0.28	-1.2944	1.58662e-22	1.50945e-21
105370504	LOC105370504	lncRNA	known	1.87	0.14	1.64	0.48	0.62	0.65	-1.14777	2.74742e-22	2.59006e-21
105377785	LOC105377785	lncRNA	known	0.59	0.11	0.64	0.61	0.55	0.21	1.15401	2.95525e-22	2.78262e-21
107984543	LOC107984543	lncRNA	known	0.14	0.23	0.69	0.33	0.53	1.36	1.26299	3.94196e-21	3.57762e-20
105378917	LOC105378917	lncRNA	known	0.62	1.04	1.48	0.39	0.41	0.54	-1.01982	6.31789e-21	5.67935e-20
101927400	LOC101927400	lncRNA	known	1.46	0.44	2.75	0.82	0.87	1.1	-1.45182	1.02479e-20	9.15934e-20
107986064	LOC107986064	lncRNA	known	0.87	0.43	1.97	0.46	0.59	0.72	-1.00749	5.30574e-20	4.63056e-19
105373877	DIRC3-AS1	lncRNA	known	0.14	0.42	1.25	0.1	0.11	0.15	-1.70566	7.28828e-20	6.3201e-19
102723944	LOC102723944	lncRNA	known	0.24	0.28	3.27	0.86	0.66	0.4	-1.0318	9.06089e-20	7.82239e-19
152742	LINC01085	lncRNA	known	0.68	0.1	2.93	0.1	0.16	0.45	-1.98216	8.69851e-19	7.26399e-18
102724571	LNCTAM34A	lncRNA	known	1.64	1.02	2.49	0.96	0.73	0.35	-1.17861	1.10318e-18	9.18788e-18
105377540	LOC105377540	lncRNA	known	3.38	1.38	1.06	0.81	0.59	0.97	-1.47941	4.55886e-18	3.71056e-17
105372108	LOC105372108	lncRNA	known	0.25	0.43	1.47	0.45	0.89	2.76	1.18771	5.18243e-18	4.2115e-17
105369360	LOC105369360	lncRNA	known	0.19	0.37	3.43	0.24	0.68	0.59	-1.19909	8.13171e-18	6.56542e-17
101930370	LOC101930370	lncRNA	known	0.5	0.54	2.02	0.52	0.53	0.24	-1.16749	1.1826e-17	9.47696e-17
399972	GSEC	lncRNA	known	2.32	2.59	1.23	0.88	0.74	0.63	-1.2297	3.00024e-17	2.36595e-16
101929723	LINC01914	lncRNA	known	0.94	2.4	0.48	3.99	2.42	2.52	1.28001	1.98876e-16	1.51909e-15
105376208	LOC105376208	lncRNA	known	1.39	0.35	1.46	0.44	0.62	0.38	-1.43856	4.72091e-16	3.53326e-15
105374433	LOC105374433	lncRNA	known	0.31	0.18	1.56	1.08	0.8	2.64	1.14381	5.01163e-16	3.74544e-15
100287765	LINC00630	lncRNA	known	0.4	0.31	1.28	0.14	0.19	0.27	-1.45176	6.87996e-16	5.11841e-15
441072	FLJ31104	lncRNA	known	0.19	0.14	1.37	0.28	0.23	0.14	-1.18227	5.30174e-15	3.79652e-14
103695365	LINC01435	lncRNA	known	0.97	0.4	6.06	0.3	0.16	1.91	-1.34894	8.00144e-15	5.67496e-14
440132	LINC00545	lncRNA	known	1.31	0.89	0.37	1.38	0.77	3.7	1.23909	1.82632e-14	1.27385e-13
100132832	PMS2P9	lncRNA	known	0.1	0.59	3.49	0.43	0.94	0.61	-1.11534	2.09156e-14	1.45429e-13
101927486	LOC101927486	lncRNA	known	1.86	1.22	1.29	0.41	0.53	0.34	-1.82984	8.07884e-14	5.48872e-13
100506804	LOC100506804	lncRNA	known	0.65	0.45	0.41	0.31	0.35	0.39	-1.08004	1.24123e-13	8.33826e-13
102724810	LINC02062	lncRNA	known	0.49	1.43	5.38	0.62	2.07	0.69	-1.24439	1.52878e-13	1.02237e-12
100652739	RAET1E-AS1	lncRNA	known	2.66	0.8	1.26	0.68	0.36	0.59	-1.14763	1.71231e-13	1.14339e-12
647946	MIR924HG	lncRNA	known	0.21	0.47	1.76	0.29	0.15	0.49	-1.49184	4.10573e-13	2.69366e-12
101929352	LOC101929352	lncRNA	known	0.54	0.72	3.65	0.34	1.31	0.47	-1.13185	1.33376e-12	8.52254e-12
107984505	LOC107984505	lncRNA	known	0.62	1.37	1.6	0.47	0.49	0.39	-1.40597	3.44664e-12	2.15161e-11
101927597	NCK1-DT	lncRNA	known	0.31	0.25	1.53	0.39	0.42	0.17	-1.03127	4.30892e-12	2.66798e-11
107986188	LOC107986188	lncRNA	known	0.6	0.39	1.01	0.16	0.54	0.26	-1.01693	8.15621e-12	4.9789e-11
101928669	LOC101928669	lncRNA	known	0.9	0.6	2.73	0.85	0.18	0.71	-1.06534	1.01427e-11	6.16616e-11
400798	C1orf220	lncRNA	known	0.23	0.2	2	0.16	0.38	0.33	-1.20334	1.40951e-11	8.49111e-11
100505812	CARD8-AS1	lncRNA	known	0.33	0.24	0.31	0.82	0.72	0.62	1.305	1.70677e-11	1.02403e-10
100532732	MSH5-SAPCD1	lncRNA	known	0.16	0.25	3.24	0.38	0.85	0.37	-1.29515	2.38477e-11	1.41906e-10
101927084	LINC01359	lncRNA	known	0.29	0.71	1.97	0.38	0.37	0.31	-1.25815	2.46856e-11	1.46668e-10
102723576	LOC102723576	lncRNA	known	0.69	0.48	0.67	0.29	0.43	0.1	-1.09636	2.54973e-11	1.51318e-10
149773	APCDD1L-DT	lncRNA	known	0.26	0.73	0.28	0.61	0.9	1.02	1.03662	2.87827e-11	1.70588e-10
100507257	MEG9	lncRNA	known	0.11	0.24	0.78	0.33	1.28	0.75	1.114	3.09034e-11	1.82636e-10
105373954	LOC105373954	lncRNA	known	0.29	0.37	0.3	0.98	0.55	0.42	1.07393	2.03171e-10	1.14202e-09
107984755	LOC107984755	lncRNA	known	0.27	0.71	1.03	0.28	0.34	0.32	-1.22343	3.09542e-10	1.72007e-09
554249	LOC554249	lncRNA	known	0.32	0.62	0.45	1.23	0.56	1.86	1.27958	1.1017e-09	5.91312e-09
100507283	LOC100507283	lncRNA	known	1.05	0.73	0.46	0.3	0.45	0.21	-1.13651	1.15213e-09	6.17526e-09
149134	LINC01341	lncRNA	known	0.28	0.27	1.67	0.3	0.27	0.16	-1.34377	1.77355e-09	9.37855e-09
102724850	LOC102724850	lncRNA	known	0.24	0.75	0.95	1.36	0.95	1.83	1.00192	2.22859e-09	1.17291e-08
100996307	LIPE-AS1	lncRNA	known	0.67	0.59	2.36	0.48	1.04	0.61	-1.0381	2.33923e-09	1.22803e-08
100190938	RAMP2-AS1	lncRNA	known	0.48	0.15	0.5	0.15	0.37	0.13	-1.25682	4.03735e-09	2.08679e-08
107985203	LOC107985203	lncRNA	known	0.16	0.27	0.33	0.24	1.21	0.87	1.90801	5.1865e-09	2.6587e-08
642946	FLVCR1-DT	lncRNA	known	0.73	0.16	0.44	1.69	0.97	1.14	1.08265	6.37641e-08	3.02113e-07
100874032	PRRT3-AS1	lncRNA	known	0.53	0.24	0.56	0.14	0.21	0.43	-1.01171	9.96839e-08	4.65924e-07
114036	LINC00310	lncRNA	known	0.23	0.26	0.43	0.2	0.27	0.22	-1.29498	1.07646e-07	5.02083e-07
442075	EMC3-AS1	lncRNA	known	0.27	0.7	0.72	0.22	0.11	0.3	-1.057	1.71816e-07	7.87244e-07
102723696	LOC102723696	lncRNA	known	0.56	0.27	0.35	0.88	1.27	0.76	1.05843	3.09301e-07	1.3902e-06
283692	CPEB1-AS1	lncRNA	known	0.59	0.17	0.69	0.23	0.22	0.13	-1.18796	5.73535e-07	2.52218e-06
5380	PMS2P2	lncRNA	known	0.2	0.15	0.39	0.46	1.22	0.87	1.8409	7.17814e-07	3.12665e-06
51716	CES1P1	lncRNA	known	0.7	0.22	1.19	0.78	0.61	2.31	1.06185	9.33528e-07	4.02852e-06
101927305	SNHG27	lncRNA	known	0.14	0.36	4.19	0.14	1.1	0.33	-1.37274	1.08605e-06	4.65383e-06
107986085	LINC02019	lncRNA	known	0.61	0.47	0.57	0.29	0.32	0.18	-1.05142	1.20737e-06	5.14892e-06
105374085	LOC105374085	lncRNA	known	0.34	0.42	0.29	0.13	0.18	0.15	-1.43241	1.68244e-06	7.07228e-06
101929693	RARA-AS1	lncRNA	known	1.84	0.39	0.25	0.56	0.36	0.34	-1.03047	1.17084e-05	4.5087e-05
107985665	LOC107985665	lncRNA	known	0.61	0.16	0.49	0.2	0.1	0.11	-1.91505	1.52175e-05	5.77996e-05
107984262	LOC107984262	lncRNA	known	0.1	0.19	0.49	0.13	0.2	0.1	-1.01837	2.72962e-05	0.000100695
102723758	LOC102723758	lncRNA	known	0.33	0.47	0.36	0.14	0.29	0.11	-1.22638	2.7517e-05	0.000101449
101929202	MKX-AS1	lncRNA	known	0.12	1.28	0.6	0.41	0.24	0.1	-1.41548	3.37624e-05	0.000123048
101928856	LOC101928856	lncRNA	known	0.47	1.3	7.5	0.16	1.81	0.83	-1.21898	5.57115e-05	0.000198061
101929746	ZNF341-AS1	lncRNA	known	0.66	0.78	0.51	0.16	0.25	0.47	-1.11526	7.25105e-05	0.00025373
100874260	UBE2CP5	lncRNA	known	0.17	0.1	1.23	0.19	0.26	0.16	-1.16667	7.88398e-05	0.000274306
101927571	LOC101927571	lncRNA	known	0.38	0.2	2.01	0.16	0.16	0.31	-1.10986	0.000100093	0.000343724
107984576	LOC107984576	lncRNA	known	0.13	0.16	0.48	0.11	0.23	0.32	-1.08611	0.000107542	0.000367803
